# Supplementary material for: Definition of metafounders based on population structure analysis
Source: Springer Nature journal article supplement (doi:10.1186/s12711-024-00913-7), 2024-06-06

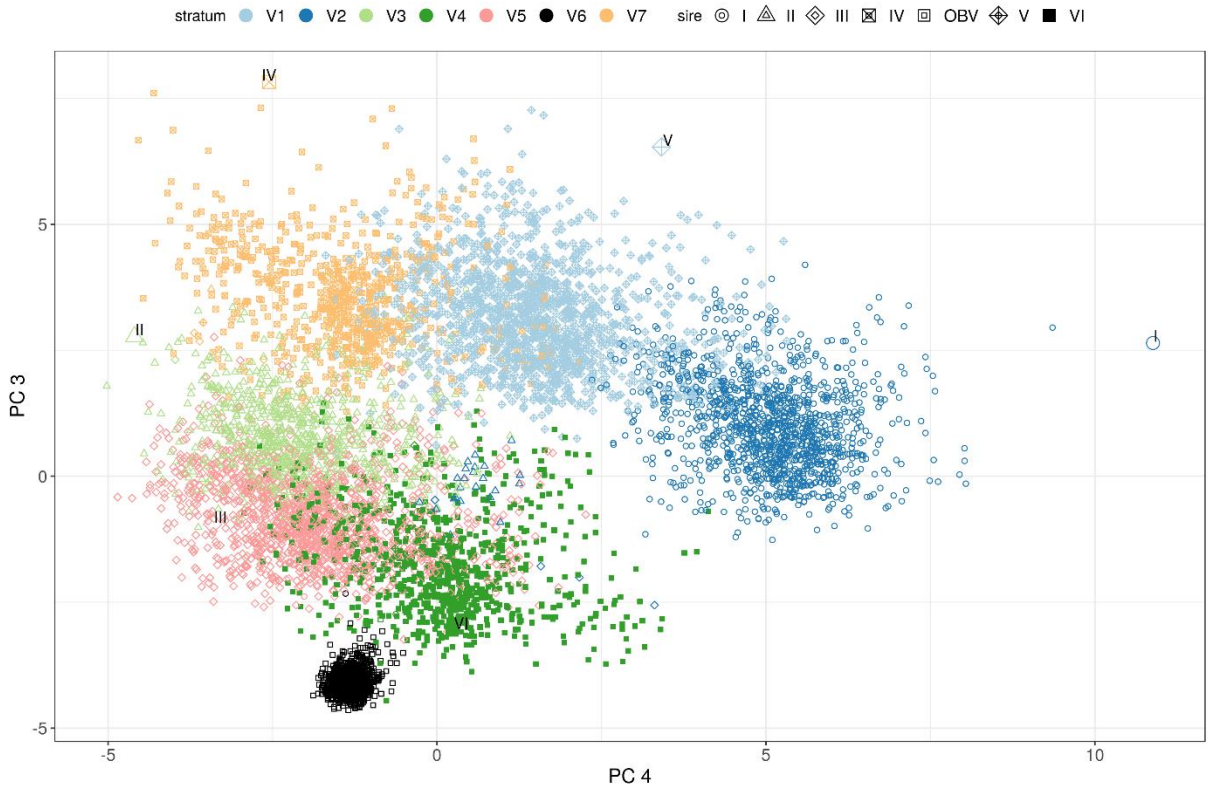

Supplement: MOESM1 [file 12711_2024_913_MOESM1_ESM.pdf]
