# Supplementary material for: Definition of metafounders based on population structure analysis
Source: Springer Nature journal article supplement (doi:10.1186/s12711-024-00913-7), 2024-06-06
Supplement: MOESM2 [file 12711_2024_913_MOESM2_ESM.pdf]

Additional File 2

Table S1: Detailed structure of the full data set (S1).

| Birth year | 1950-1959 |        | 1960-1969 |        | 1970-1979 |        | 1980-1989 |        | 1990-1999 |        | 2000-2009 |        | 2010-2019 |        | 2020-2022 |        |
|------------|-----------|--------|-----------|--------|-----------|--------|-----------|--------|-----------|--------|-----------|--------|-----------|--------|-----------|--------|
|            | male      | female | male      | female | male      | female | male      | female | male      | female | male      | female | male      | female | male      | female |
| CHE        | 0         | 0      | 0         | 0      | 95        | 0      | 186       | 0      | 624       | 0      | 1024      | 3      | 2395      | 14     | 605       | 1      |
| DEA        | 0         | 0      | 1         | 0      | 21        | 1      | 80        | 0      | 905       | 6      | 1364      | 1037   | 15,300    | 35,384 | 4495      | 14,077 |
| ITA        | 0         | 0      | 2         | 0      | 59        | 0      | 161       | 0      | 513       | 1      | 522       | 0      | 1239      | 3      | 34        | 1      |
| OBV        | 0         | 0      | 23        | 0      | 38        | 0      | 14        | 0      | 118       | 0      | 199       | 0      | 561       | 2      | 224       | 1      |
| OTHER      | 0         | 0      | 0         | 0      | 1         | 0      | 9         | 0      | 143       | 0      | 203       | 8      | 1071      | 31     | 294       | 10     |
| USACAN     | 3         | 0      | 22        | 0      | 57        | 0      | 123       | 0      | 344       | 0      | 448       | 0      | 759       | 15     | 375       | 0      |

Assignment was done by country of origin: CHE = Switzerland, DEA = Germany and Austria, ITA = Italy, OBV = Animals recorded as Original Braunvieh, USACAN = United States of America and Canada, OTHER = Other country of origin.

Table S2: Results for S3 (additional sample with reduced relationship).

| <b>k</b> | <b>a</b> | <b>b</b> | <b>R<sup>2</sup></b> | $\bar{G} - \bar{A}^{\Gamma}$ | $\overline{\text{diag}(G)} - \overline{\text{diag}(A^{\Gamma})}$ |
|----------|----------|----------|----------------------|------------------------------|------------------------------------------------------------------|
| 2        | -0.026   | 1.059    | 0.802                | -0.019                       | -0.024                                                           |
| 3        | -0.020   | 1.071    | 0.784                | -0.034                       | -0.036                                                           |
| 4        | -0.051   | 1.109    | 0.793                | -0.033                       | -0.039                                                           |
| 5        | -0.059   | 1.117    | 0.794                | -0.031                       | -0.038                                                           |
| 6        | -0.053   | 1.104    | 0.797                | -0.026                       | -0.036                                                           |
| 7        | -0.054   | 1.104    | 0.797                | -0.026                       | -0.037                                                           |
| 8        | -0.061   | 1.110    | 0.800                | -0.024                       | -0.037                                                           |
| 9        | -0.056   | 1.099    | 0.800                | -0.019                       | -0.034                                                           |
| 10       | -0.061   | 1.098    | 0.803                | -0.014                       | -0.031                                                           |
| 15       | -0.071   | 1.094    | 0.811                | -0.001                       | -0.021                                                           |
| 20       | -0.054   | 1.056    | 0.814                | 0.012                        | -0.010                                                           |
| 21       | -0.050   | 1.047    | 0.817                | 0.014                        | -0.009                                                           |
| 22       | -0.047   | 1.041    | 0.817                | 0.016                        | -0.007                                                           |
| 23       | -0.032   | 1.017    | 0.818                | 0.019                        | -0.004                                                           |
| 24       | -0.022   | 0.999    | 0.817                | 0.023                        | 0.000                                                            |
| 25       | -0.022   | 0.996    | 0.817                | 0.025                        | 0.001                                                            |
| 30       | -0.021   | 0.980    | 0.811                | 0.036                        | 0.011                                                            |
| 35       | -0.014   | 0.956    | 0.805                | 0.047                        | 0.021                                                            |
| 40       | -0.050   | 0.997    | 0.809                | 0.052                        | 0.028                                                            |

k = number of stratifications considered, a = intercept, b = slope of the regression, R<sup>2</sup> = fit of the regression, G = genomic relationship matrix, A<sup>Γ</sup> = numerator relationship matrix amended by stratification information,  $\bar{G} - \bar{A}^{\Gamma}$  = Difference of means of both matrices,  $\overline{\text{diag}(G)} - \overline{\text{diag}(A^{\Gamma})}$  = Difference of the means of the diagonals of both matrices.

Table S3: Results for S4 (additional sample of 4152 randomly selected animals).

| <b>k</b> | <b>a</b> | <b>b</b> | <b>R<sup>2</sup></b> | $\bar{G} - \bar{A}^F$ | $\overline{diag(G)} - \overline{diag(A^F)}$ |
|----------|----------|----------|----------------------|-----------------------|---------------------------------------------|
| 2        | 0.339    | 0.531    | 0.639                | 0.019                 | 0.015                                       |
| 3        | 0.258    | 0.652    | 0.698                | 0.009                 | 0.004                                       |
| 4        | 0.226    | 0.696    | 0.700                | 0.007                 | 0.000                                       |
| 5        | 0.213    | 0.712    | 0.720                | 0.008                 | 0.000                                       |
| 6        | 0.206    | 0.717    | 0.721                | 0.010                 | 0.000                                       |
| 7        | 0.202    | 0.722    | 0.721                | 0.011                 | 0.000                                       |
| 8        | -0.003   | 1.033    | 0.809                | -0.022                | -0.033                                      |
| 9        | -0.006   | 1.032    | 0.810                | -0.018                | -0.032                                      |
| 10       | -0.046   | 1.083    | 0.814                | -0.018                | -0.034                                      |
| 15       | -0.059   | 1.082    | 0.814                | -0.004                | -0.027                                      |
| 20       | -0.075   | 1.083    | 0.816                | 0.011                 | -0.017                                      |
| 21       | -0.075   | 1.082    | 0.814                | 0.012                 | -0.016                                      |
| 22       | -0.075   | 1.076    | 0.817                | 0.017                 | -0.012                                      |
| 23       | -0.078   | 1.079    | 0.815                | 0.017                 | -0.012                                      |
| 24       | -0.073   | 1.070    | 0.814                | 0.020                 | -0.010                                      |
| 25       | -0.074   | 1.069    | 0.814                | 0.022                 | -0.008                                      |
| 30       | -0.084   | 1.069    | 0.815                | 0.031                 | -0.001                                      |
| 35       | -0.092   | 1.069    | 0.813                | 0.039                 | 0.007                                       |
| 40       | -0.096   | 1.065    | 0.810                | 0.047                 | 0.014                                       |

k = number of stratifications considered, a = intercept, b = slope of the regression, R<sup>2</sup> = fit of the regression, G = genomic relationship matrix, A<sup>F</sup> = numerator relationship matrix amended by stratification information,  $\bar{G} - \bar{A}^F$  = Difference of means of both matrices,  $\overline{diag(G)} - \overline{diag(A^F)}$  = Difference of the means of the diagonals of both matrices.
