# Supplementary material for: Definition of metafounders based on population structure analysis
Source: Springer Nature journal article supplement (doi:10.1186/s12711-024-00913-7), 2024-06-06
Supplement: MOESM3 [file 12711_2024_913_MOESM3_ESM.pdf]

A comparison of the approximation proposed by Legarra et al. [12] and the approximation presented in this paper:

The comparison was based on a small example pedigree taken from Legarra et al. [12] to illustrate the different aspects of both approaches.

Example Pedigree:

| animal | sire | dam |
|--------|------|-----|
| MF1    | NA   | NA  |
| MF2    | NA   | NA  |
| F1     | MF1  | MF1 |
| F2     | MF1  | MF1 |
| F3     | MF1  | MF2 |
| F4     | MF2  | MF2 |
| F5     | MF2  | MF2 |
| A1     | F1   | F24 |
| A2     | F2   | F3  |
| A3     | F4   | F5  |
| A4     | A1   | A2  |
| A5     | F3   | A3  |
| A6     | A1   | F3  |
| A7     | A4   | A5  |

MF1 and MF2 are metafounders that were included in the pedigree. Animals F1 to F5 are the pedigree base, where animal F3 is a mixture of the two MF. The following  $\Gamma$  matrix is assumed:

$$\begin{bmatrix} 0.10 & 0.05 \\ 0.05 & 0.20 \end{bmatrix}$$

$A^{\Gamma}$  following the 'tabular method' including the two MF:

|     | MF1  | MF2  | F1   | F2   | F3   | F4   | F5   | F6   | F7   | A1   | A2   | A3   | A4   | A5   |
|-----|------|------|------|------|------|------|------|------|------|------|------|------|------|------|
| MF1 | 0.10 | 0.05 | 0.10 | 0.10 | 0.08 | 0.05 | 0.05 | 0.10 | 0.09 | 0.05 | 0.09 | 0.06 | 0.09 | 0.08 |
| MF2 | 0.05 | 0.20 | 0.05 | 0.05 | 0.12 | 0.20 | 0.20 | 0.05 | 0.09 | 0.20 | 0.07 | 0.16 | 0.09 | 0.12 |
| F1  | 0.10 | 0.05 | 1.05 | 0.10 | 0.08 | 0.05 | 0.05 | 0.58 | 0.09 | 0.05 | 0.33 | 0.06 | 0.33 | 0.20 |
| F2  | 0.10 | 0.05 | 0.10 | 1.05 | 0.08 | 0.05 | 0.05 | 0.58 | 0.56 | 0.05 | 0.57 | 0.06 | 0.33 | 0.32 |
| F3  | 0.08 | 0.12 | 0.08 | 0.08 | 1.02 | 0.12 | 0.12 | 0.08 | 0.55 | 0.12 | 0.31 | 0.57 | 0.55 | 0.44 |
| F4  | 0.05 | 0.20 | 0.05 | 0.05 | 0.12 | 1.10 | 0.20 | 0.05 | 0.09 | 0.65 | 0.07 | 0.39 | 0.09 | 0.23 |
| F5  | 0.05 | 0.20 | 0.05 | 0.05 | 0.12 | 0.20 | 1.10 | 0.05 | 0.09 | 0.65 | 0.07 | 0.39 | 0.09 | 0.23 |
| F6  | 0.10 | 0.05 | 0.58 | 0.58 | 0.08 | 0.05 | 0.05 | 1.05 | 0.33 | 0.05 | 0.69 | 0.06 | 0.56 | 0.38 |
| F7  | 0.09 | 0.09 | 0.09 | 0.56 | 0.55 | 0.09 | 0.09 | 0.33 | 1.04 | 0.09 | 0.68 | 0.32 | 0.44 | 0.50 |
| A1  | 0.05 | 0.20 | 0.05 | 0.05 | 0.12 | 0.65 | 0.65 | 0.05 | 0.09 | 1.10 | 0.07 | 0.61 | 0.09 | 0.34 |
| A2  | 0.09 | 0.07 | 0.33 | 0.57 | 0.31 | 0.07 | 0.07 | 0.69 | 0.68 | 0.07 | 1.16 | 0.19 | 0.50 | 0.68 |
| A3  | 0.06 | 0.16 | 0.06 | 0.06 | 0.57 | 0.39 | 0.39 | 0.06 | 0.32 | 0.61 | 0.19 | 1.06 | 0.32 | 0.63 |
| A4  | 0.09 | 0.09 | 0.33 | 0.33 | 0.55 | 0.09 | 0.09 | 0.56 | 0.44 | 0.09 | 0.50 | 0.32 | 1.04 | 0.41 |
| A5  | 0.08 | 0.12 | 0.20 | 0.32 | 0.44 | 0.23 | 0.23 | 0.38 | 0.50 | 0.34 | 0.68 | 0.63 | 0.41 | 1.10 |

For the calculation of the approximation, the  $Q$ -matrix of animals in the pedigree is needed. Tracing contributions of the two MF through the pedigree,  $Q$  is:

|    | MF1    | MF2    |
|----|--------|--------|
| F1 | 1.0000 | 0.0000 |
| F2 | 1.0000 | 0.0000 |
| F3 | 0.5000 | 0.5000 |
| F4 | 0.0000 | 1.0000 |
| F5 | 0.0000 | 1.0000 |
| F6 | 1.0000 | 0.0000 |
| F7 | 0.7500 | 0.2500 |
| A1 | 0.0000 | 1.0000 |
| A2 | 0.8750 | 0.1250 |
| A3 | 0.2500 | 0.7500 |
| A4 | 0.7500 | 0.2500 |
| A5 | 0.5625 | 0.4375 |

## Legarra approximation

With this  $\mathbf{Q}$  an approximation of  $\mathbf{A}^\Gamma$  as proposed by Legarra et al.[12]:

$$\mathbf{A}^\Gamma \approx \mathbf{A}(\mathbf{I} - 0.5 * \mathit{diag}(\mathbf{Q}\mathbf{Q}') + \mathbf{Q}\mathbf{Q}'$$

was calculated (in the following comparisons the exact version is presented first, followed by results of the approximation. Results are only for animals of the pedigree).

Comparisons for animals in the pedigree:

### Exact $\mathbf{A}^\Gamma$

|    | F1    | F2    | F3    | F4    | F5    | F6    | F7    | A1    | A2    | A3    | A4    | A5    |
|----|-------|-------|-------|-------|-------|-------|-------|-------|-------|-------|-------|-------|
| F1 | 1.050 | 0.100 | 0.075 | 0.050 | 0.050 | 0.575 | 0.088 | 0.050 | 0.331 | 0.062 | 0.325 | 0.197 |
| F2 | 0.100 | 1.050 | 0.075 | 0.050 | 0.050 | 0.575 | 0.562 | 0.050 | 0.569 | 0.062 | 0.325 | 0.316 |
| F3 | 0.075 | 0.075 | 1.025 | 0.125 | 0.125 | 0.075 | 0.550 | 0.125 | 0.312 | 0.575 | 0.550 | 0.444 |
| F4 | 0.050 | 0.050 | 0.125 | 1.100 | 0.200 | 0.050 | 0.088 | 0.650 | 0.069 | 0.388 | 0.088 | 0.228 |
| F5 | 0.050 | 0.050 | 0.125 | 0.200 | 1.100 | 0.050 | 0.088 | 0.650 | 0.069 | 0.388 | 0.088 | 0.228 |
| F6 | 0.575 | 0.575 | 0.075 | 0.050 | 0.050 | 1.050 | 0.325 | 0.050 | 0.688 | 0.062 | 0.562 | 0.375 |
| F7 | 0.088 | 0.562 | 0.550 | 0.088 | 0.088 | 0.325 | 1.038 | 0.088 | 0.681 | 0.319 | 0.438 | 0.500 |
| A1 | 0.050 | 0.050 | 0.125 | 0.650 | 0.650 | 0.050 | 0.088 | 1.100 | 0.069 | 0.612 | 0.088 | 0.341 |
| A2 | 0.331 | 0.569 | 0.312 | 0.069 | 0.069 | 0.688 | 0.681 | 0.069 | 1.163 | 0.191 | 0.500 | 0.677 |
| A3 | 0.062 | 0.062 | 0.575 | 0.388 | 0.388 | 0.062 | 0.319 | 0.612 | 0.191 | 1.062 | 0.319 | 0.627 |
| A4 | 0.325 | 0.325 | 0.550 | 0.088 | 0.088 | 0.562 | 0.438 | 0.088 | 0.500 | 0.319 | 1.038 | 0.409 |
| A5 | 0.197 | 0.316 | 0.444 | 0.228 | 0.228 | 0.375 | 0.500 | 0.341 | 0.677 | 0.627 | 0.409 | 1.095 |

### Legarra Approximation of $\mathbf{A}^\Gamma$

|    | F1    | F2    | F3    | F4    | F5    | F6    | F7    | A1    | A2    | A3    | A4    | A5    |
|----|-------|-------|-------|-------|-------|-------|-------|-------|-------|-------|-------|-------|
| F1 | 1.050 | 0.100 | 0.075 | 0.050 | 0.050 | 0.575 | 0.088 | 0.050 | 0.332 | 0.062 | 0.327 | 0.197 |
| F2 | 0.100 | 1.050 | 0.075 | 0.050 | 0.050 | 0.575 | 0.566 | 0.050 | 0.571 | 0.062 | 0.327 | 0.316 |
| F3 | 0.075 | 0.075 | 1.050 | 0.125 | 0.125 | 0.075 | 0.566 | 0.125 | 0.320 | 0.578 | 0.566 | 0.454 |
| F4 | 0.050 | 0.050 | 0.125 | 1.100 | 0.200 | 0.050 | 0.088 | 0.650 | 0.069 | 0.395 | 0.088 | 0.235 |
| F5 | 0.050 | 0.050 | 0.125 | 0.200 | 1.100 | 0.050 | 0.088 | 0.650 | 0.069 | 0.395 | 0.088 | 0.235 |
| F6 | 0.575 | 0.575 | 0.075 | 0.050 | 0.050 | 1.050 | 0.327 | 0.050 | 0.690 | 0.062 | 0.566 | 0.376 |
| F7 | 0.088 | 0.562 | 0.562 | 0.088 | 0.088 | 0.325 | 1.044 | 0.088 | 0.684 | 0.320 | 0.446 | 0.504 |
| A1 | 0.050 | 0.050 | 0.125 | 0.650 | 0.650 | 0.050 | 0.088 | 1.100 | 0.069 | 0.628 | 0.088 | 0.354 |
| A2 | 0.331 | 0.569 | 0.319 | 0.069 | 0.069 | 0.688 | 0.685 | 0.069 | 1.165 | 0.191 | 0.506 | 0.678 |
| A3 | 0.062 | 0.062 | 0.588 | 0.388 | 0.388 | 0.062 | 0.327 | 0.612 | 0.194 | 1.069 | 0.327 | 0.642 |
| A4 | 0.325 | 0.325 | 0.562 | 0.088 | 0.088 | 0.562 | 0.446 | 0.088 | 0.505 | 0.320 | 1.044 | 0.415 |
| A5 | 0.197 | 0.316 | 0.453 | 0.228 | 0.228 | 0.375 | 0.506 | 0.341 | 0.679 | 0.630 | 0.416 | 1.107 |

Correlation of all elements of the matrices is  $> 0.999$ .

Comparison of diagonal elements of both matrices:

|          | F1   | F2   | F3    | F4  | F5  | F6   | F7      | A1  | A2       | A3      | A4      | A5       |
|----------|------|------|-------|-----|-----|------|---------|-----|----------|---------|---------|----------|
| Exact:   | 1.05 | 1.05 | 1.025 | 1.1 | 1.1 | 1.05 | 1.03750 | 1.1 | 1.162500 | 1.06250 | 1.03750 | 1.095312 |
| Legarra: | 1.05 | 1.05 | 1.050 | 1.1 | 1.1 | 1.05 | 1.04375 | 1.1 | 1.164648 | 1.06875 | 1.04375 | 1.106812 |

Especially for animal F3 (which has contributions of 0.5 of each MF) a relatively large difference (0.025) in the diagonal element can be observed. The Legarra approximation overestimates the inbreeding coefficient of the admixed animal.

## New approximation

For the approach presented in the paper  $\mathbf{\Gamma}$  is rescaled to the heterozygosity corresponding to a pivotal  $\gamma$  ( $\mathbf{\Gamma}$  and  $\mathbf{A}$  pointing to the same base/heterozygosity).  $\mathbf{\Gamma}$  is transformed into a relationship matrix and  $\mathbf{A}^\Gamma$  is calculated and finally rescaled to a base of maximum heterozygosity (0.5) to be on the same scale as  $\mathbf{G}$ .

Assuming a pivotal  $\gamma$  of 0.1, the corresponding heterozygosity ( $H_B = 0.5 - 0.25\gamma$ ) is 0.475. Rescaling  $\mathbf{\Gamma}$  to a base of 0.475 yields:

$$\begin{bmatrix} 0.000 & -0.053 \\ -0.053 & 0.105 \end{bmatrix}$$

$\mathbf{\Gamma}$  in the form of a relationship matrix (diagonal is  $1 + 0.5*\text{self-relationship}$ ):

$$\begin{bmatrix} 1.000 & -0.053 \\ -0.053 & 1.053 \end{bmatrix}$$

Now  $\mathbf{A}^{\Gamma} \approx \mathbf{A} + \mathbf{Q}(\mathbf{\Gamma} - \text{diag}(\mathbf{2}))\mathbf{Q}'$  can be calculated:

|    | F1     | F2     | F3     | F4     | F5     | F6     | F7     | A1     | A2     | A3     | A4     | A5    |
|----|--------|--------|--------|--------|--------|--------|--------|--------|--------|--------|--------|-------|
| F1 | 1.000  | 0.000  | -0.026 | -0.053 | -0.053 | 0.500  | -0.013 | -0.053 | 0.243  | -0.039 | 0.237  | 0.102 |
| F2 | 0.000  | 1.000  | -0.026 | -0.053 | -0.053 | 0.500  | 0.487  | -0.053 | 0.493  | -0.039 | 0.237  | 0.227 |
| F3 | -0.026 | -0.026 | 0.987  | 0.000  | 0.000  | -0.026 | 0.480  | 0.000  | 0.227  | 0.493  | 0.480  | 0.360 |
| F4 | -0.053 | -0.053 | 0.000  | 1.053  | 0.053  | -0.053 | -0.026 | 0.553  | -0.039 | 0.276  | -0.026 | 0.118 |
| F5 | -0.053 | -0.053 | 0.000  | 0.053  | 1.053  | -0.053 | -0.026 | 0.553  | -0.039 | 0.276  | -0.026 | 0.118 |
| F6 | 0.500  | 0.500  | -0.026 | -0.053 | -0.053 | 1.000  | 0.237  | -0.053 | 0.618  | -0.039 | 0.487  | 0.289 |
| F7 | -0.013 | 0.487  | 0.480  | -0.026 | -0.026 | 0.237  | 0.984  | -0.026 | 0.610  | 0.227  | 0.359  | 0.419 |
| A1 | -0.053 | -0.053 | 0.000  | 0.553  | 0.553  | -0.053 | -0.026 | 1.053  | -0.039 | 0.526  | -0.026 | 0.243 |
| A2 | 0.243  | 0.493  | 0.227  | -0.039 | -0.039 | 0.618  | 0.610  | -0.039 | 1.114  | 0.094  | 0.423  | 0.604 |
| A3 | -0.039 | -0.039 | 0.493  | 0.276  | -0.039 | -0.039 | 0.227  | 0.526  | 0.094  | 1.010  | 0.227  | 0.552 |
| A4 | 0.237  | 0.237  | 0.480  | -0.026 | -0.026 | 0.487  | 0.359  | -0.026 | 0.423  | 0.227  | 0.984  | 0.325 |
| A5 | 0.102  | 0.227  | 0.360  | 0.118  | 0.118  | 0.289  | 0.419  | 0.243  | 0.604  | 0.552  | 0.325  | 1.047 |

And rescaled to a base of 0.5:

|    | F1    | F2    | F3    | F4    | F5    | F6    | F7    | A1    | A2    | A3    | A4    | A5    |
|----|-------|-------|-------|-------|-------|-------|-------|-------|-------|-------|-------|-------|
| F1 | 1.050 | 0.100 | 0.075 | 0.050 | 0.050 | 0.575 | 0.088 | 0.050 | 0.331 | 0.063 | 0.325 | 0.197 |
| F2 | 0.100 | 1.050 | 0.075 | 0.050 | 0.050 | 0.575 | 0.563 | 0.050 | 0.569 | 0.063 | 0.325 | 0.316 |
| F3 | 0.075 | 0.075 | 1.038 | 0.100 | 0.100 | 0.075 | 0.556 | 0.100 | 0.316 | 0.569 | 0.556 | 0.442 |
| F4 | 0.050 | 0.050 | 0.100 | 1.100 | 0.150 | 0.050 | 0.075 | 0.625 | 0.063 | 0.363 | 0.075 | 0.213 |
| F5 | 0.050 | 0.050 | 0.100 | 0.150 | 1.100 | 0.050 | 0.075 | 0.625 | 0.063 | 0.363 | 0.075 | 0.213 |
| F6 | 0.575 | 0.575 | 0.075 | 0.050 | 0.050 | 1.050 | 0.325 | 0.050 | 0.688 | 0.063 | 0.563 | 0.375 |
| F7 | 0.088 | 0.563 | 0.556 | 0.075 | 0.075 | 0.325 | 1.034 | 0.075 | 0.680 | 0.316 | 0.441 | 0.498 |
| A1 | 0.050 | 0.050 | 0.100 | 0.625 | 0.625 | 0.050 | 0.075 | 1.100 | 0.063 | 0.600 | 0.075 | 0.331 |
| A2 | 0.331 | 0.569 | 0.316 | 0.063 | 0.063 | 0.688 | 0.680 | 0.063 | 1.159 | 0.189 | 0.502 | 0.674 |
| A3 | 0.063 | 0.063 | 0.569 | 0.363 | 0.363 | 0.063 | 0.316 | 0.600 | 0.189 | 1.059 | 0.316 | 0.624 |
| A4 | 0.325 | 0.325 | 0.556 | 0.075 | 0.075 | 0.563 | 0.441 | 0.075 | 0.502 | 0.316 | 1.034 | 0.409 |
| A5 | 0.197 | 0.316 | 0.442 | 0.213 | 0.213 | 0.375 | 0.498 | 0.331 | 0.674 | 0.624 | 0.409 | 1.094 |

Correlation of all elements of this approximation to the exact  $\mathbf{A}^{\Gamma}$  is  $> 0.999$ .

Comparing the diagonal elements of all three matrices (exact on the top, Legarra approximation in the middle, new approximation at the bottom), the new approximation shows overall a slightly better compliance to the exact version especially with admixed animals.

|          | F1   | F2   | F3    | F4  | F5  | F6   | F7    | A1  | A2    | A3    | A4    | A5    |
|----------|------|------|-------|-----|-----|------|-------|-----|-------|-------|-------|-------|
| Exact:   | 1.05 | 1.05 | 1.025 | 1.1 | 1.1 | 1.05 | 1.038 | 1.1 | 1.163 | 1.062 | 1.038 | 1.095 |
| Legarra: | 1.05 | 1.05 | 1.050 | 1.1 | 1.1 | 1.05 | 1.044 | 1.1 | 1.165 | 1.069 | 1.044 | 1.107 |
| New:     | 1.05 | 1.05 | 1.038 | 1.1 | 1.1 | 1.05 | 1.034 | 1.1 | 1.159 | 1.059 | 1.034 | 1.094 |

An approximation of  $\mathbf{A}^{\Gamma}$  as described seems to be reasonably accurate. The example illustrates that rescaling is conceptually separable from the introduction of stratification information.
